# Supplementary material for: Electrochemical Behavior of Natural Manganese Oxides: Transforming Mining Waste into Energy Storage Materials
Source: MDPI journal article supplement (doi:10.3390/min14050455), 2024-04-26
Supplement: s1 [file s1]

# Electrochemical behavior of natural Manganese oxides: Transforming mining waste into energy storage materials

George Soulamidis<sup>1,\*</sup>, Maria Kourmoussi<sup>2,3</sup>, Christiana A. Mitsopoulou<sup>2,3</sup> and Christina Stouraiti<sup>1</sup>

Supplementary Table S1.

**Table S1.** Elemental composition obtained by TEM/EDS for sample MXL3

|   | Mn %  | O %   | Mg % | Na % | Ca % | K %  | Zn % | Pb %  | S %  | Total % |
|---|-------|-------|------|------|------|------|------|-------|------|---------|
| 1 | 59.23 | 37.04 | -    | -    | -    | -    | 0.53 | -     | -    | 96.8    |
| 2 | 61.75 | 35.79 | 0.19 | 0.1  | 0.1  | 0.27 | -    | -     | -    | 98.2    |
| 3 | 43.7  | 40.31 | 0.57 | 0.88 | 1.45 | 0.25 | 1.24 | 10.39 | -    | 98.79   |
| 4 | 59.77 | 35.46 | 0.49 | 1.14 | 1.78 | 0.69 | 0.4  | -     | 0.26 | 99.99   |

Supplementary Figure S1.

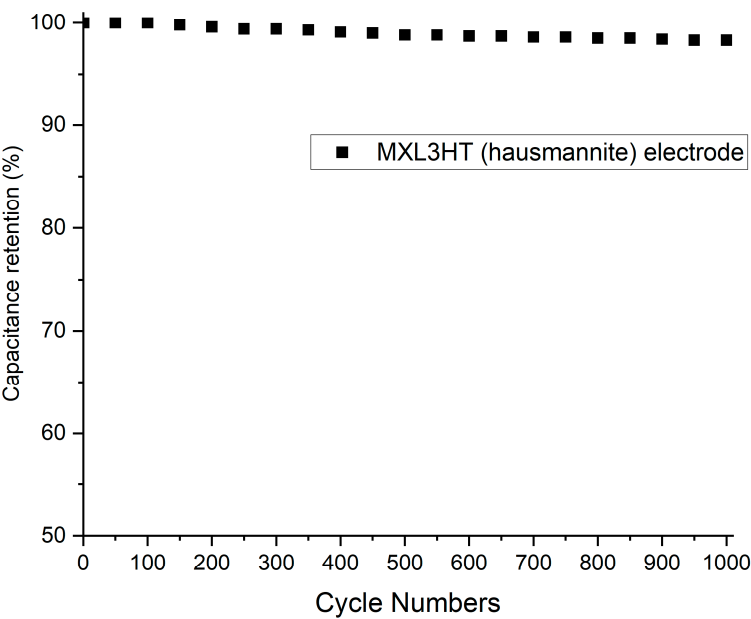

**Figure S1** Cycle performance of hausmannite electrode (MXL3HT)
